# Supplementary material for: Aberrant X chromosome skewing and acquired clonal hematopoiesis in adult-onset common variable immunodeficiency
Source: JCI journal article supplement (doi:10.1172/jci.insight.127614), 2019-07-24
Supplement: sd1 [file 1]

You are being redirected.
